# Supplementary material for: Mesoporous composite cathode materials prepared from inverse micelle structures for high performance lithium ion batteries
Source: Royal Society of Chemistry journal article supplement (doi:10.1039/c3ra45654d), 2014-01-01
Supplement: c3ra45654d.pdf [file c3ra45654d.pdf]

## **"Mesoporous Composite Cathode Materials Prepared from Inverse Micelle Structure for High Performance Lithium Ion Batteries"**

**Si-Jin Kim,<sup>a</sup> Young-Woo Lee,<sup>a</sup> Bo-Mi Hwang,<sup>a</sup> Seong-Bae Kim,<sup>a,b</sup> Woo-Seong Kim,<sup>b</sup> Guozhong Cao,<sup>c</sup> and Kyung-Won Park<sup>a,\*</sup>**

*Department of Chemical Engineering, Soongsil University, Seoul 156-743, Republic of Korea*

[\\*kwpark@ssu.ac.kr](mailto:*kwpark@ssu.ac.kr)

Supporting materials include:

Part I. Supplementary figures

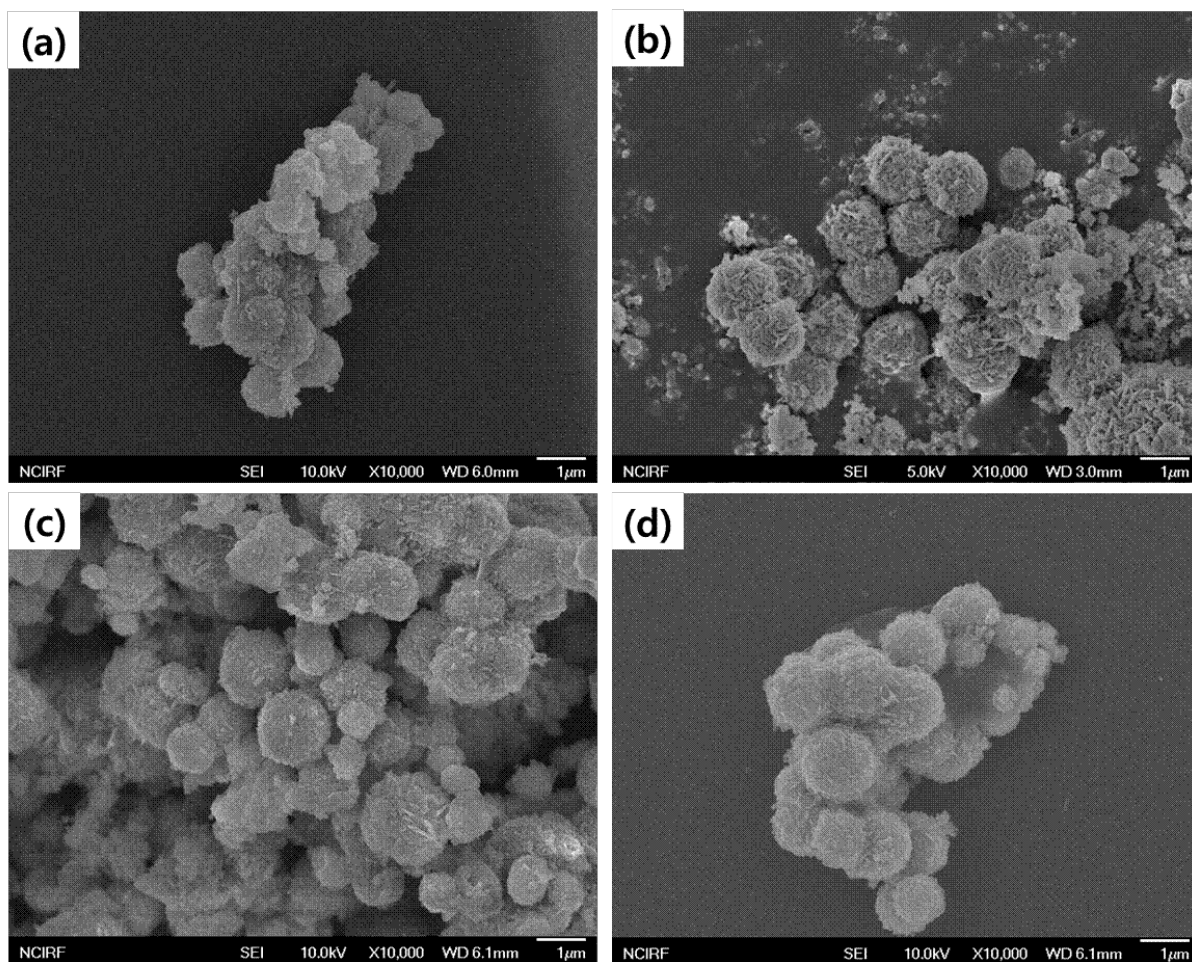

**Fig. S1** SEM images of  $\text{Li}_4\text{Mn}_5\text{O}_{12}/\text{Li}_2\text{MnO}_3$  composite electrodes prepared with the Li/Mn of (a) 1.5, (b) 1.9, (c) 2.5 and (d) 3.0.

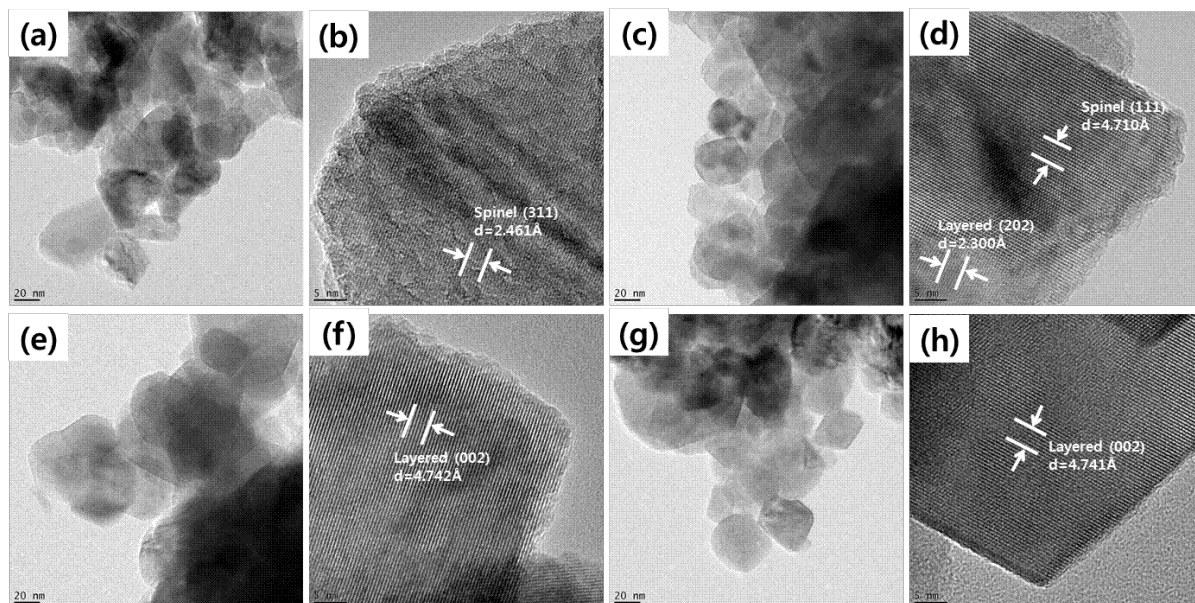

**Fig. S2** TEM and HR-TEM images of  $\text{Li}_4\text{Mn}_5\text{O}_{12}/\text{Li}_2\text{MnO}_3$  composite electrodes prepared with the Li/Mn of (a),(b) 1.5; (c),(d) 1.9; (e),(f) 2.5; and (g),(h) 3.0.

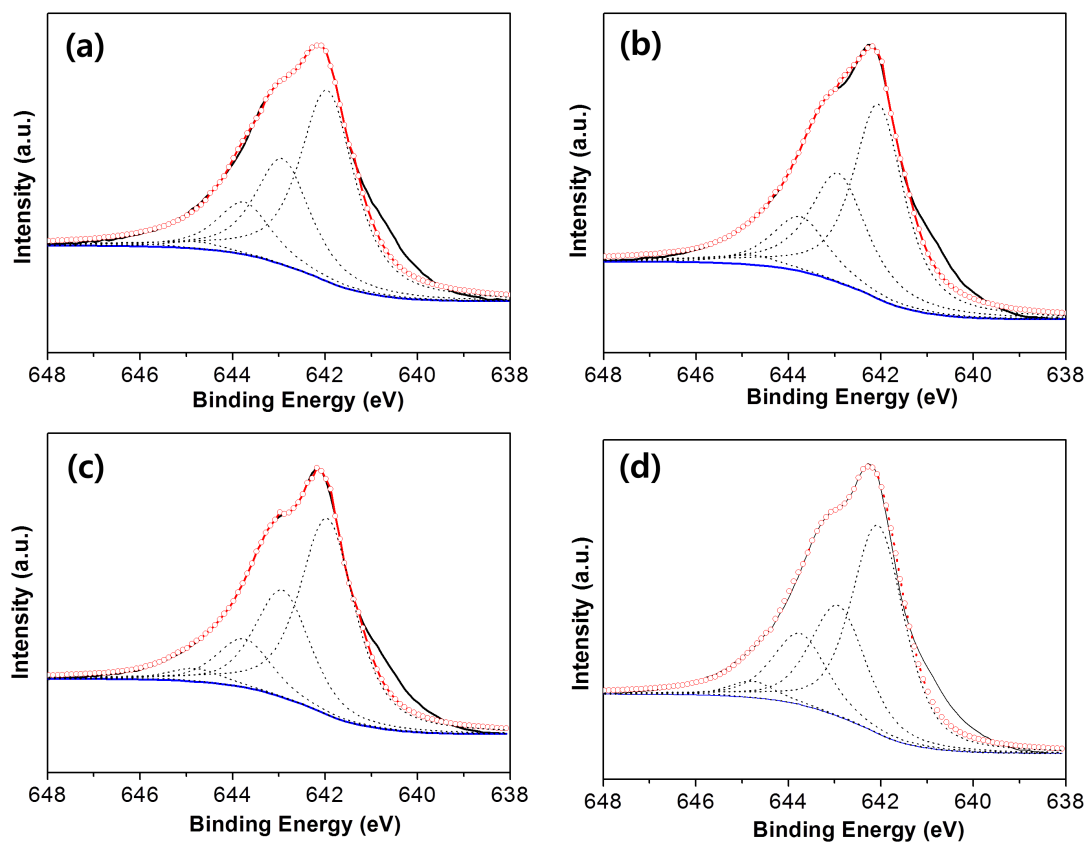

**Fig. S3** XPS Mn<sub>2p<sub>3/2</sub></sub> spectra of Li<sub>4</sub>Mn<sub>5</sub>O<sub>12</sub>/Li<sub>2</sub>MnO<sub>3</sub> composite electrodes prepared with the Li/Mn of (a) 1.5, (b) 1.9, (c) 2.5, and (d) 3.0.
